# Supplementary material
Source: publisher figshare collection journal article supplement (https://asha.figshare.com/articles/dataset/_/28323629)
Supplement: Supplementary file 4 [file 1]

**Supplemental Material S17.** Mean distortion output by listening scope condition at 2000 hz.

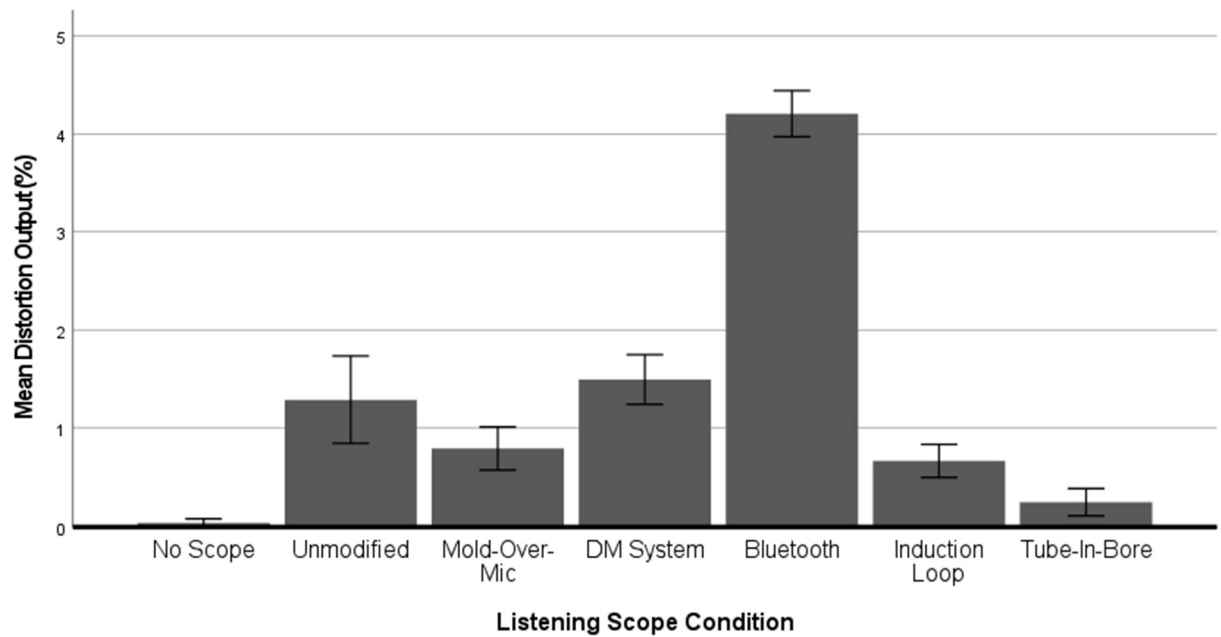

*Note.* The y-axis was rescaled compared to other graphs to best fit data for this frequency. Error bars indicate the standard error of the mean.
