# Supplementary material
Source: publisher figshare collection journal article supplement (https://asha.figshare.com/articles/dataset/_/28323629)

**Supplemental Material S7.** Tube-in-bore scope condition: distortion output by frequency per trial.

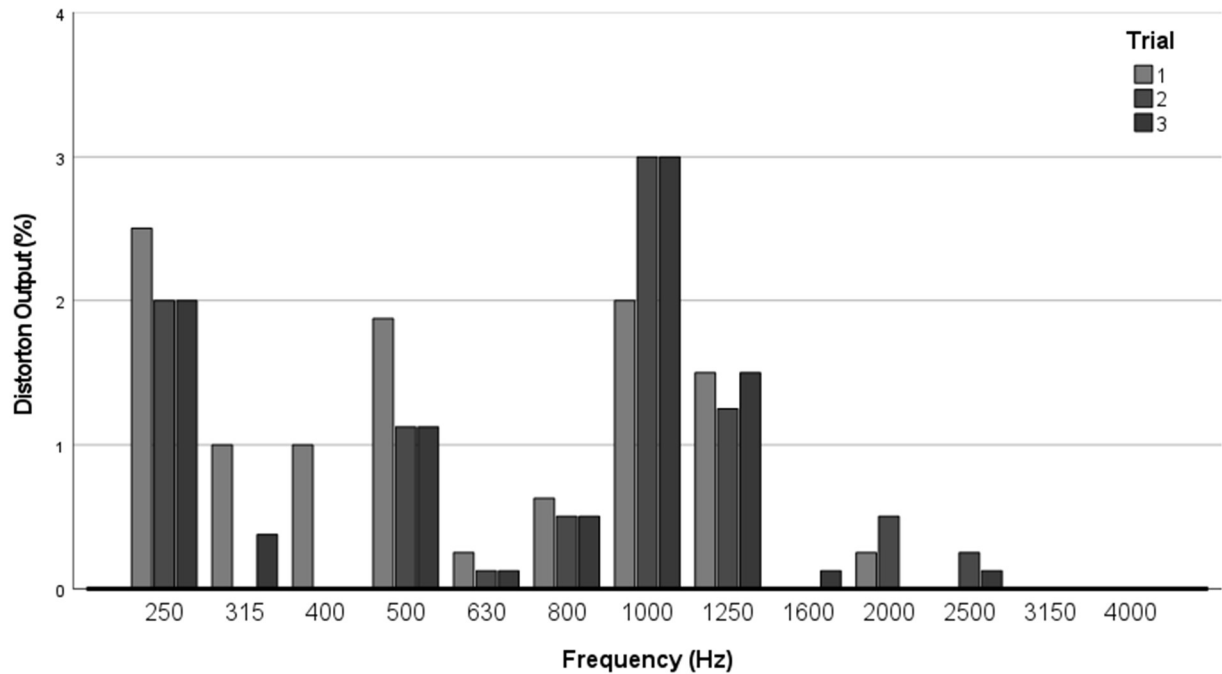

Supplement: Supplementary file 9 [file 1]
