# Supplementary material
Source: publisher figshare collection journal article supplement (https://asha.figshare.com/articles/dataset/_/28323629)

**Supplemental Material S2.** Unmodified scope condition: Distortion output by frequency per trial.

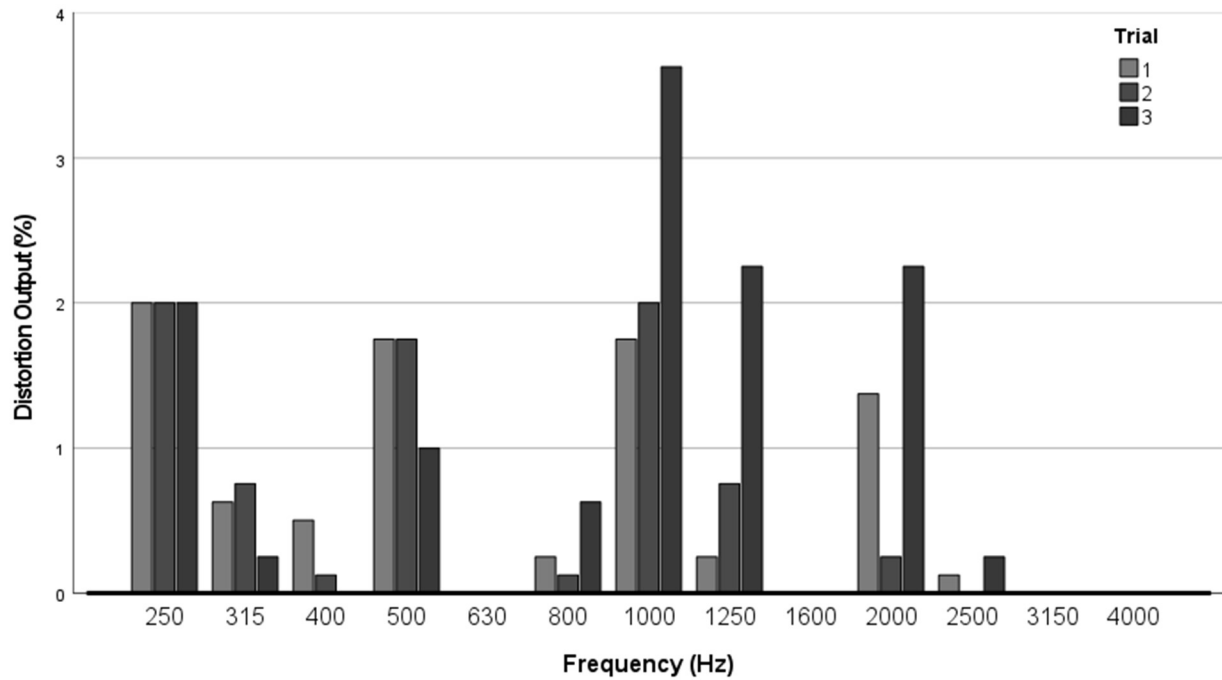

Supplement: Supplementary file 10 [file 1]
