# Supplementary material
Source: publisher figshare collection journal article supplement (https://asha.figshare.com/articles/dataset/_/28323629)
Supplement: Supplementary file 14 [file 1]

**Supplemental Material S5.** Bluetooth scope condition: Distortion output by frequency per trial.

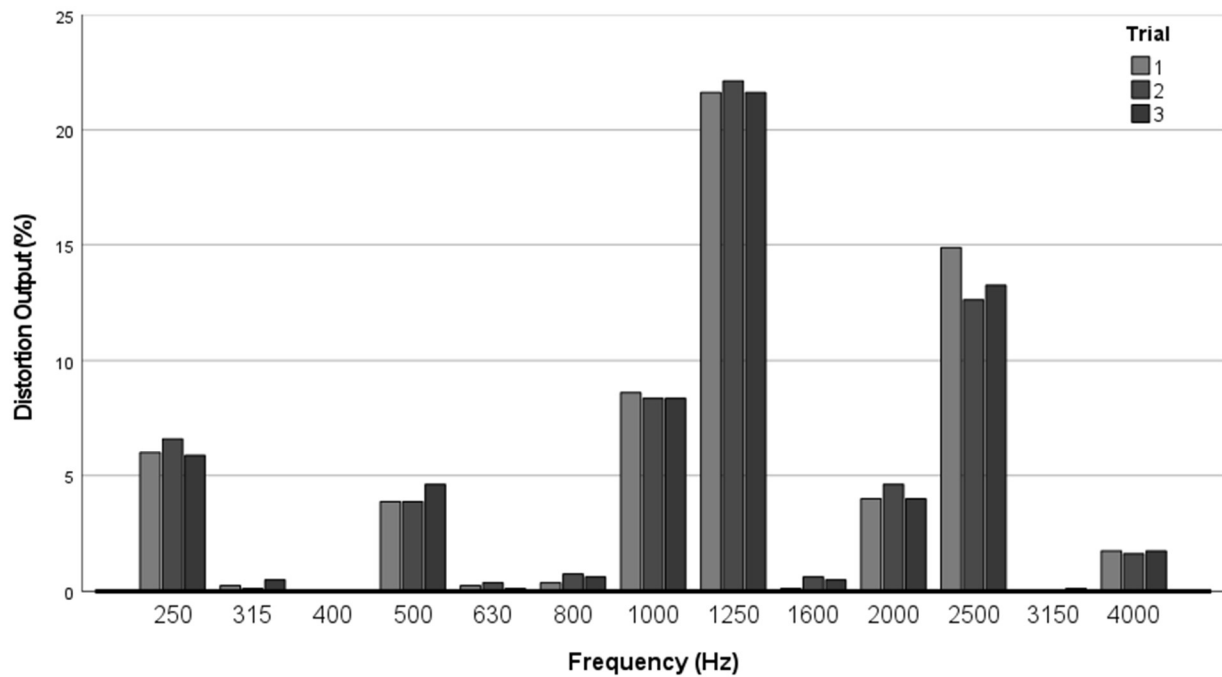

*Note.* The y-axis was rescaled to best fit the data for this condition.
