# Supplementary material
Source: publisher figshare collection journal article supplement (https://asha.figshare.com/articles/dataset/_/28323629)
Supplement: Supplementary file 18 [file 1]

**Supplemental Material S13.** Mean distortion output by listening scope condition at 800 hz.

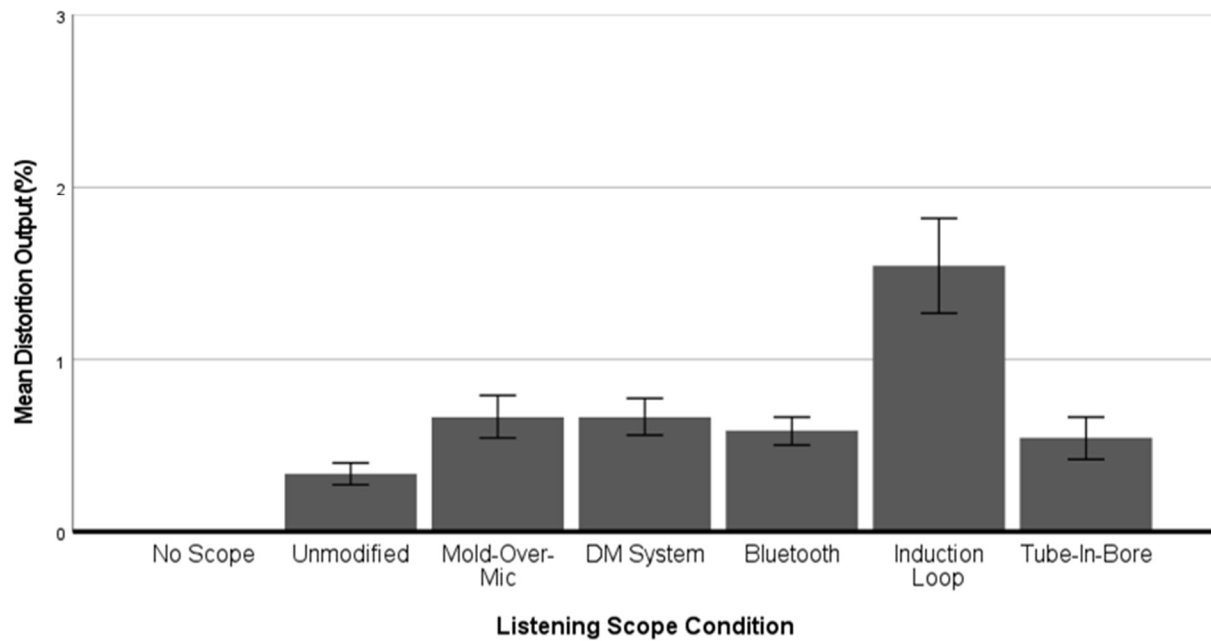

*Note.* Error bars indicate the standard error of the mean.
