# Supplementary material
Source: publisher figshare collection journal article supplement (https://asha.figshare.com/articles/dataset/_/28323629)

**Supplemental Material S3.** Mold-over-mic condition: Distortion output per frequency by trial.

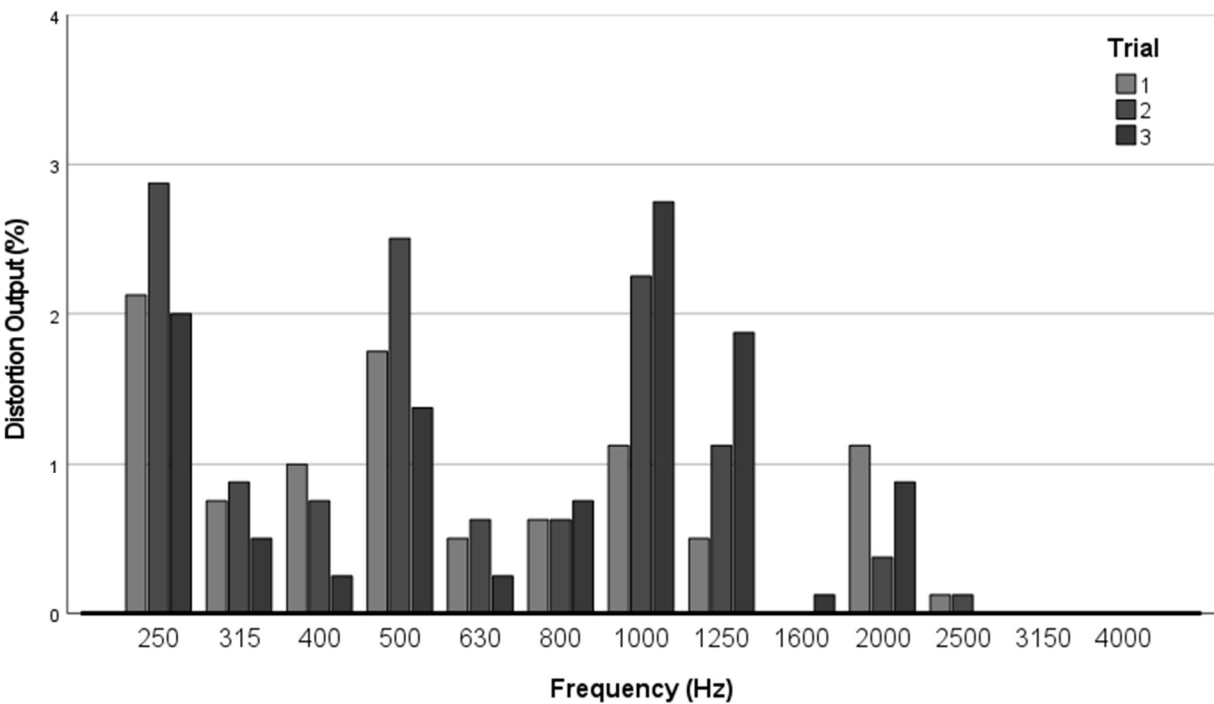

Supplement: Supplementary file 6 [file 1]

**Supplemental Material S1.** No scope condition: distortion output by frequency per trial.

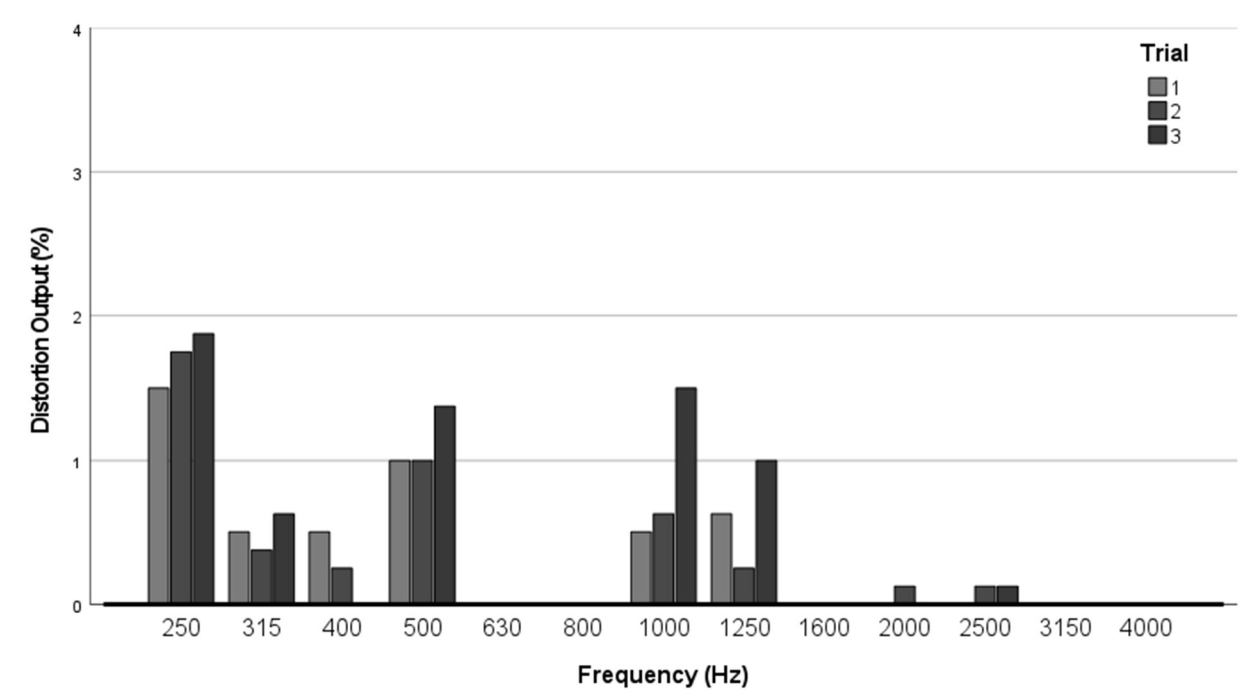

Supplement: Supplementary file 7 [file 1]

**Supplemental Material S4.** DM system scope condition: Distortion output by frequency per trial.

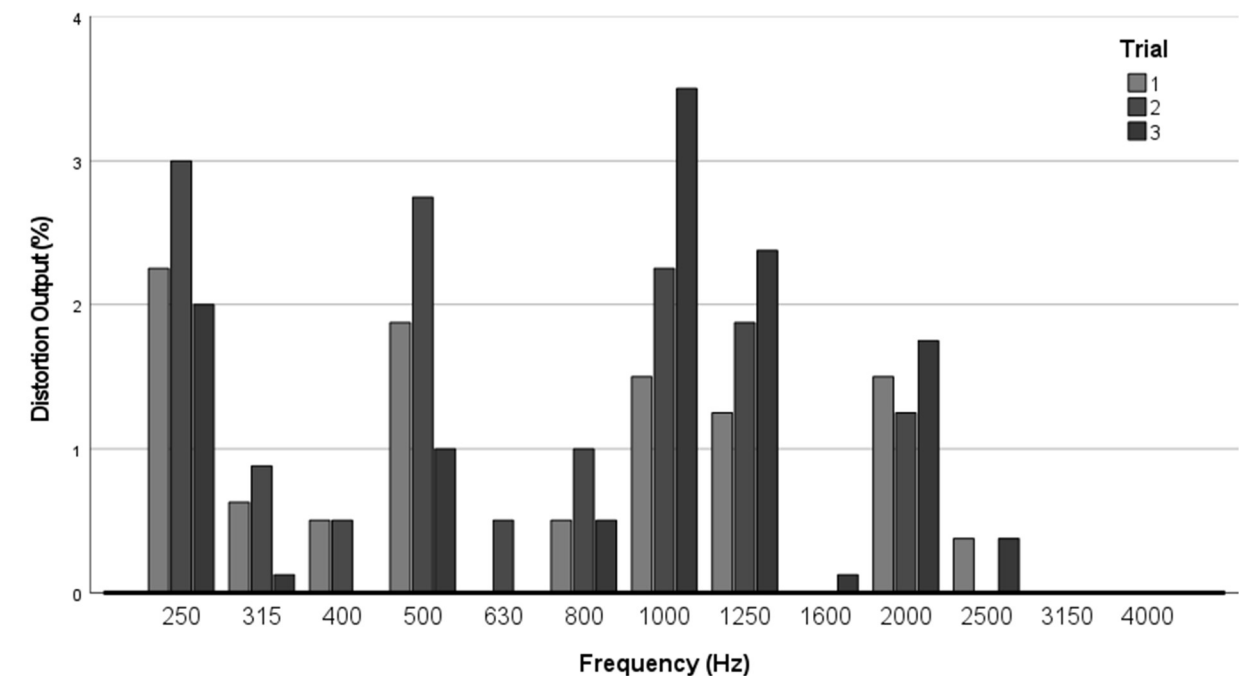

Supplement: Supplementary file 16 [file 1]
